# Supplementary material for: Processed Food–Sweets Patterns and Related Behaviors with Attention Deficit Hyperactivity Disorder among Children: A Case–Control Study
Source: MDPI journal article supplement (doi:10.3390/nu15051254), 2023-03-02
Supplement: s1 [file s1]

**Table S1.** Dietary nutrient intake of ADHD and control group children [Median (P<sub>25</sub>, P<sub>75</sub>)]

| Dietary nutrient intake  | RNI       | ADHD (n=102)            | Controls (n=102)        | Z      | <i>P</i> -Values |
|--------------------------|-----------|-------------------------|-------------------------|--------|------------------|
| Energy (Kcal/d)          | 1400-2350 | 1771.1 (1404.9, 2005.8) | 1510.2 (1315.2, 1757.0) | -2.755 | <b>0.006</b>     |
| Protein (g/d)            | 40-60     | 69.5 (53.1, 86.7)       | 66.3 (55.0, 71.6)       | -1.735 | 0.083            |
| Fat (g/d)                | 42.0-73.1 | 68.7 (57.6, 87.4)       | 63.4 (53.8, 76.8)       | -2.216 | <b>0.027</b>     |
| Carbohydrate (g/d)       | 222-263   | 196.8 (158.3, 244.2)    | 166.7 (145.3, 211.3)    | -2.586 | <b>0.010</b>     |
| Calcium (mg/d)           | 1000-1200 | 499.4 (357.1, 649.3)    | 551.7 (384.8, 728.8)    | -1.386 | 0.166            |
| Iron (mg/d)              | 13-18     | 15.4 (12.5, 19.7)       | 14.4 (12.4, 17.5)       | -1.197 | 0.231            |
| Zinc (mg/d)              | 7-12      | 10.9 (8.7, 13.9)        | 10.4 (8.3, 12.6)        | -0.902 | 0.367            |
| Selenium (µg/d)          | 25-55     | 38.9 (29, 51.6)         | 35.8 (31.9, 43.2)       | -1.412 | 0.158            |
| Phosphorus (mg/d)        | 470-710   | 1054.9 (798.5, 1217.7)  | 942.3 (758.1, 1096.7)   | -1.685 | 0.092            |
| Iodine (µg/d)            | 90-120    | 29.0 (19.1, 40.5)       | 22.0 (17.0, 32.0)       | -2.656 | <b>0.008</b>     |
| Nicotinic acid (mg NE/d) | 10-16     | 17.4 (13.0, 22.3)       | 15.6 (12.1, 18.9)       | -2.193 | <b>0.028</b>     |
| Folic acid (µg DFE/d)    | 250-400   | 135.6 (89.9, 187.5)     | 130.6 (96.5, 190.9)     | -0.407 | 0.684            |

RNI: recommended nutrient intake. *p*-Values <0.05 are bolded.
